# Supplementary material
Source: Springer Nature journal article supplement (https://mijn.bsl.nl/resource/supplementary/13047_2010_340_MOESM2_ESM.pdf/7110542)
Supplement: MOESM2 [file 7110542]

**For all items on this page:**

**1=Unacceptable - very limited knowledge/skills; 2=Limited - insufficient level of knowledge/skills; 3=Adequate - acceptable level of knowledge/skills; 4=Capable - competent  
5=Proficient - highly competent**

**How would you describe your current knowledge/ability on the following tasks relating to PODIATRY patients. Please mark CLEARLY (cross) ONE box only like so ☒**

|                                                                                                                                 | <b>1</b>                 | <b>2</b>                 | <b>3</b>                 | <b>4</b>                 | <b>5</b>                 |
|---------------------------------------------------------------------------------------------------------------------------------|--------------------------|--------------------------|--------------------------|--------------------------|--------------------------|
| <b>Clinical ability to assess high-risk</b>                                                                                     |                          |                          |                          |                          |                          |
| - Demonstrated ability to perform ankle brachial indexes                                                                        | <input type="checkbox"/> |
| - Demonstrated ability to perform toe pressures                                                                                 | <input type="checkbox"/> |
| - Demonstrated ability to correctly record toe pressures                                                                        | <input type="checkbox"/> |
| - Demonstrated ability to interpret toe pressures correctly and apply findings                                                  | <input type="checkbox"/> |
| <b>Clinical ability to assess foot ulcers:</b>                                                                                  |                          |                          |                          |                          |                          |
| - Demonstrated ability to define foot ulcer types (i.e. neuropathic, ischaemic, neuroischaemic)                                 | <input type="checkbox"/> |
| - Demonstrated ability to debride appropriate non-viable                                                                        | <input type="checkbox"/> |
| - Demonstrated ability to correctly measure foot ulcer                                                                          | <input type="checkbox"/> |
| - Demonstrated ability to accurately record foot ulcer                                                                          | <input type="checkbox"/> |
| <b>Clinical ability to assess infection:</b>                                                                                    |                          |                          |                          |                          |                          |
| - Demonstrated ability to measure infected tissue                                                                               | <input type="checkbox"/> |
| - Demonstrated ability to accurately record infected tissue                                                                     | <input type="checkbox"/> |
| - Demonstrated ability to interpret implications of infected tissue and categorise diabetic foot ulcer infection classification | <input type="checkbox"/> |
| - Demonstrated ability to co-ordinate management of a range of diabetic foot infection classifications                          | <input type="checkbox"/> |
| - Demonstrated ability to interpret biochemical and radiology results in relation to infection status                           | <input type="checkbox"/> |
| <b>Clinical ability to assess wound products:</b>                                                                               |                          |                          |                          |                          |                          |
| - Demonstrated correct measurement of exudate levels                                                                            | <input type="checkbox"/> |
| - Demonstrated correct recording of exudate level and type                                                                      | <input type="checkbox"/> |
| - Demonstrated ability to interpret findings with regard to exudate level and type and apply findings                           | <input type="checkbox"/> |
| - Demonstrated ability to apply the appropriate dressing regime for the exudate levels recorded                                 | <input type="checkbox"/> |
| <b>Clinical knowledge of off-loading:</b>                                                                                       |                          |                          |                          |                          |                          |
| - Demonstrated knowledge of appropriate indication of use of Removable Cast Walkers                                             | <input type="checkbox"/> |
| - Demonstrated ability to appropriately apply Removable Cast Walkers                                                            | <input type="checkbox"/> |
| <b>Ability to work in a multi-disciplinary team:</b>                                                                            |                          |                          |                          |                          |                          |
| - Demonstrated ability to refer appropriately for high blood glucose level management                                           | <input type="checkbox"/> |
| - Demonstrated ability to deliver patient care plans and/or specific foot health education                                      | <input type="checkbox"/> |

**PLEASE TURN OVER**
